# Supplementary material for: First fully-diurnal fog and low cloud satellite detection reveals lifecycle in the Namib
Source: Copernicus journal article supplement (doi:10.5194/amt-2018-213), 2018-07-10
Supplement: Supplementary file [file amt-2018-213-AC2-supplement.pdf]

1 First fully-diurnal fog and low cloud satellite

2 detection reveals life cycle in the Namib

3 — RESPONSE TO REVIEWER 2 —

4 Hendrik Andersen and Jan Cermak

5 contact: [hendrik.andersen@kit.edu](mailto:hendrik.andersen@kit.edu)

6 We would like to thank referee 2 for her/his review of the manuscript and  
7 her/his constructive criticism. Comments by the referee are colored in blue,  
8 our replies or comments are colored in black.

9  
10 My review and comments will focus on four area: general overview, method-  
11 ology, validation, and product impact. The paper is well written and presents  
12 an interesting approach to a challenging problem.

## 13 Overview

14 The authors present an interesting approach and methodology to create a fog  
15 and low cloud product. The application of interest stated by the authors is fog  
16 detection that is hazardous to traffic and the potential for economic impact, and  
17 the need to understand the formation and dissipation processes over the region.  
18 Does the algorithm differentiate between fog and low clouds (low clouds may  
19 not reduce visibility to the same extent as the fog)? What portion of cases can  
20 be isolated or identified as fog versus low clouds? Does the FogNet stations help  
21 to isolate and identify and differentiate fog from low clouds?

22 We agree with referee 2 that the differentiation of fog and low clouds is very  
23 important for both economical and ecological aspects. The algorithm presented  
24 in this work does not differentiate between fog and low clouds, hence the abbrevi-  
25 ation FLC (fog and low clouds). As this differentiation is one of the main re-  
26 maining challenges in the satellite-based remote sensing of fog, we are currently  
27 working on this using both ground- and space-based active remote sensing as  
28 well as the available FogNet station data. As of now, we cannot give a reliable  
29 estimate of the fraction of fog in the FLC product, which may vary by loca-  
30 tion, season and time of day. As such, a differentiation of fog and low clouds is  
31 beyond the scope of this work, but will be addressed in future studies.

32 We have included the sentence "*It should be noted that the algorithm*  
 33 *presented here does not differentiate between ground fog and low-level clouds.*"  
 34 at the end of the first paragraph of section 2.2 for clarity (in the outlook, we  
 35 already mention that a retrieval of cloud-base altitudes for the separation of  
 36 low-level clouds from ground fog is needed).

37  
 38 The goal to develop a common algorithm that works well particularly  
 39 during the transition from night to day in order to monitor fog development  
 40 and dissipation with solar insolation is admirable. The authors point to other  
 41 studies that utilize different approaches during the night and day, but do  
 42 not show any failure of these approaches to properly detect the life cycle of  
 43 the fog. Are the authors aware of more recent work to produce a stable and  
 44 fully diurnal approach for the detection of fog and low clouds with the 24  
 45 hour Red-Green-Blue (RGB) microphysics products (developed and applied  
 46 to SEVIRI and GOES ABI data) using only the 8, 11, and 12 microme-  
 47 ter channels on these instruments? [https://weather.msfc.nasa.gov/sport/](https://weather.msfc.nasa.gov/sport/training/quickGuides/rgb/QuickGuide\_24hrMicroRGB\_NASA\_SPoRT.pdf)  
 48 [training/quickGuides/rgb/QuickGuide\\\_24hrMicroRGB\\\_NASA\\\_SPoRT.pdf](https://weather.msfc.nasa.gov/sport/training/quickGuides/rgb/QuickGuide\_24hrMicroRGB\_NASA\_SPoRT.pdf),  
 49 [https://www.eumetsat.int/website/home/Data/Training/TrainingLibrary/](https://www.eumetsat.int/website/home/Data/Training/TrainingLibrary/DAT\_2044069.html)  
 50 [DAT\\\_2044069.html](https://www.eumetsat.int/website/home/Data/Training/TrainingLibrary/DAT\_2044069.html). Or NOAA's low cloud and fog product?  
 51 <https://www.goes-r.gov/products/opt2-low-cloud-fog.html>. Recognizing  
 52 this work or acknowledging these other approaches should be done.

53 We agree with referee 2 that the limitations of day and nighttime FLC  
 54 detection algorithms could be stated more clearly. Nighttime detection of FLC  
 55 has been achieved in many studies since the 1980s (e.g. Eyre et al., 1984;  
 56 Bendix, 2002; Cermak and Bendix, 2007), which typically rely on the difference  
 57 between a thermal ( $\approx 11 \mu\text{m}$ ) and mid-infrared ( $3.9 \mu\text{m}$ ) channel. However,  
 58 as Cermak and Bendix (2008) state: "*During daytime, however, the situation*

59 *is entirely different. The solar signal that mixes into the 3.9  $\mu\text{m}$  radiation*  
60 *renders the method useless after sunrise, as the small fog droplets reflect at this*  
61 *wavelength. Therefore an altogether different approach is needed for daytime*  
62 *fog detection.”*

63 These current day time techniques typically do not work at low solar eleva-  
64 tion angles, which is illustrated by the following examples:

- 65 • The daytime algorithm developed by Nilo et al. (2018) works only in sit-  
66 uations with solar zenith angle  $> 85^\circ$ .
- 67 • The daytime algorithms developed by Cermak and Bendix (2008) and  
68 Cermak and Bendix (2011) work only in situations with solar zenith angle  
69  $> 80^\circ$ .
- 70 • Similarly, Guls and Bendix (1996) state that ” *Unfortunately, at low sun*  
71 *elevations (with  $\theta$  close to  $90^\circ$ )  $\cos(\theta)$  [solar zenith angle] approaches zero*  
72 *and the normalised grey level approximates to infinity. Therefore, normali-*  
73 *sation is limited to sun elevations of about  $10^\circ$  (Saunders, 1985).”*

74 To summarize, separate day and nighttime algorithms are necessary, with  
75 neither one working sufficiently well at low solar elevation angles.

76 While we are aware of the qualitative products (false color composites) pro-  
77 duced by the Eumetsat, NASA and NOAA, which are a nice tool for visualiza-  
78 tion purposes, these are not products well-suited for quantitative analyses and  
79 were thus not mentioned. As we agree with referee 2 that these sets of products  
80 might be of interest to the reader, we do mention false color imagery now with  
81 the following sentence in the introduction: ” *While for visualization purposes,*  
82 *24-hour false color image products may be used in case studies, these images are*  
83 *not well-suited for quantitative analyses.”*

## 84 Methodology

85 This is an interesting 2 step approach which eliminates high clouds and then  
86 identifies fog and low cloud regions. The temporally varying compositing ap-  
87 proach to represent cloud-free scenes over land as a reference is good and has  
88 been successfully demonstrated for other cloud detection approaches. The SSIM  
89 approach to identify regions that are significantly different from the cloud-free  
90 composite is interesting although limits application to ocean coastal regions  
91 where sea surface temperature structure is limit. It would be interesting to  
92 know how the threshold (0.4) and the window size were determined.

93 The moving window is optimized to be as small as possible and still be useful  
94 for comparing local structures. The size of the moving window, as well as the  
95 threshold for the SSIM were optimized empirically, by analyzing many individ-  
96 ual scenes. We have now mentioned this more clearly in the manuscript: "*The*  
97 *size of the moving window, as well as the threshold for the SSIM were optimized*  
98 *empirically.*"

99 We would argue that the approach is not limited to coastal regions (it  
100 should work in any continental region with enough spatial variance in the  
101 composites), but it will certainly not work over ocean.

102

103 The assignment of pixels as "difficult" on the edge of fog and low cloud  
104 regions in the contextual plausibility control step seems a bit subjective. While  
105 the approach is meant to address sub-pixel issues, other issues could be coming  
106 into play (marginal thermal structure in composite, complete pixel coverage  
107 if thin or dissipating fog, etc.). Eliminating these regions makes the regions  
108 identified as fog and low cloud more limited. These "difficult" pixels also seem  
109 to be eliminate from the validation section improving statistical performance of  
110 the algorithm. Additional justification is necessary for this approach. Reason

111 for iteration of plausibility control is not clear. Can you elaborate?

112 This is an interesting point for discussion. The contextual plausibility control  
113 and the class "difficult" were created during the visual quality assessment of the  
114 algorithm of single scenes. It became apparent that sometimes, at the edges of  
115 high clouds, the algorithm can misclassify pixels as FLC. This is probably related  
116 to sub-pixel cloudiness of the high clouds that can lead to a spectral signature  
117 similar to FLC/surface. The SSIM test does not find a strong similarity with the  
118 composite, as part of the region that is evaluated is overcast with high clouds.  
119 This led to the idea of the contextual plausibility control that is designed to  
120 address this issue. It specifically looks for these situations (more than half of  
121 the pixels in the immediate neighborhood are classified as high-cloud) and, if  
122 true, labels the pixel of interest as difficult. An iterative approach is chosen, as  
123 changing the class of one pixel changes the neighborhood of all its neighboring  
124 pixels, which needs to be accounted for.

125 We now discuss this in more detail in the manuscript: "*A situation in which  
126 this approach may fail is at higher-level cloud edges. These pixels can be have  
127 a similar spectral signature to FLC and can pass the SSIM test, as the partly  
128 overlying high cloud reduces the similarity with the composites. To avoid such  
129 misclassifications, a contextual plausibility control of the detected FLC pixels is  
130 conducted after the initial classification.*"

131

132 Validation Only night-time results are presented. A proposed strength of  
133 the algorithm is its day and night performance(?) to monitor dissipation of the  
134 fog with solar insolation. How do the day-time results compare to these?

135 The validation is limited to nighttime measurements, as the net radiation  
136 measurements can be binarized rather easily during night (Fig. 3a)). This  
137 is not the case during daytime, where this would have to be done for each

138 solar zenith angle and would still be associated with higher uncertainties. We  
 139 argue that this is legitimate, as none of the channels used and no component  
 140 of the retrieval technique is physically affected by solar radiation. Thus, from  
 141 a physical point-of-view, there is no reason why the algorithm should work  
 142 differently during day time. We have looked into a large number of scenes and  
 143 found no effect of the time of day on the retrieval.

144  
 145 Labeling pixels on edges of clouds as “difficult” helps the validation statics.  
 146 What to the results look like if you add in results from the “difficult points”  
 147 What percentage of fog pixels to difficult ones?

148 Over the entire data set, the plausibility control ‘corrects’ about 3 % of the  
 149 detected FLC pixels and sets their class to ‘difficult’. As such, it only marginally  
 150 affects the quantitative validation results as presented in Fig. 1. The right-hand  
 151 panel shows the validation where the class ‘difficult’ is analyzed as if it were  
 152 classified as FLC, only leading to a slightly higher false alarm rate, with the  
 153 POD and PC virtually unchanged.

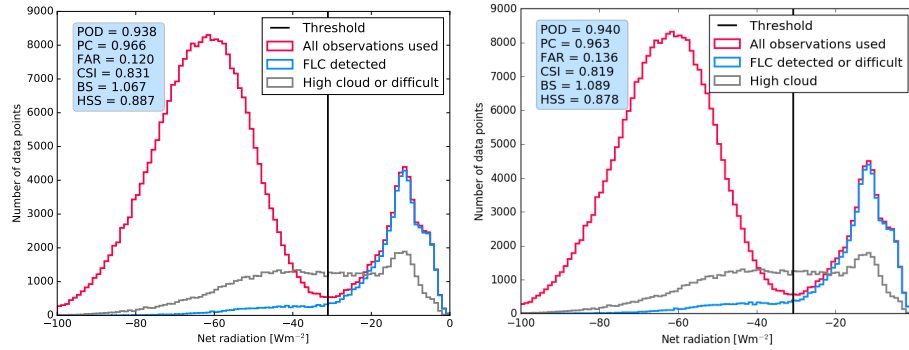

Figure 1: The validation of the algorithm as in the submitted manuscript (left) and computed without the use of the structural plausibility control (right).

154 However, thin cloud edges of higher-level clouds may lead to similar surface-  
 155 measured net radiation as FLC, making the quantitative analysis of these pixels

with net radiation measurements difficult. A detailed visual analysis of a large number of individual scenes has shown an improved performance at the edges of higher-level clouds using the plausibility control.

Is there performance variability by year or by season? This would add confidence to the use of the product for climate studies. Good discussion of the potential source of errors.

We have computed the validation as suggested by referee 2. There does not seem to be a marked yearly variability in the performance of the algorithm as illustrated by Fig. 2.

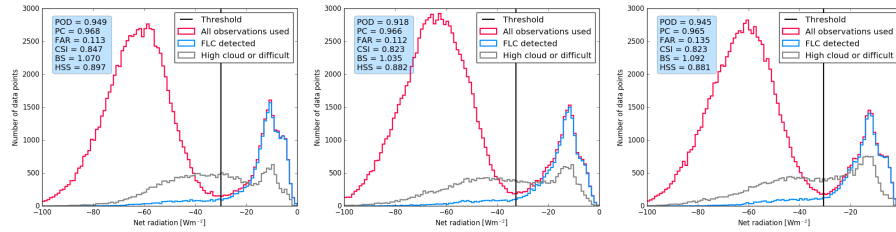

Figure 2: The validation of the algorithm computed separately for the three years 2015 (left), 2016 (center) and 2017 (right).

We also computed the validation on a seasonal basis (cf. Fig. 3), with little variation of the probability of detection and percentage correct of the classification. There does seem to be a seasonal variation in the false alarm rate, which can likely be attributed to the overall occurrence frequency of FLC as outlined in the manuscript (concerning the station GK). If only few FLC situations occur, a (small) randomly occurring misclassification has a relatively large impact. This explains the outliers of the false alarm rate of the inland station GK, as well as the relatively high false alarm rate in the season of March, April and May, where FLC occurs much less frequently. This is already described in the manuscript: "[...] the effect of this small random error on the



validation measures scales inversely with FLC occurrence.”

The results underline the applicability for climate studies. We now discuss this in more detail in the manuscript.

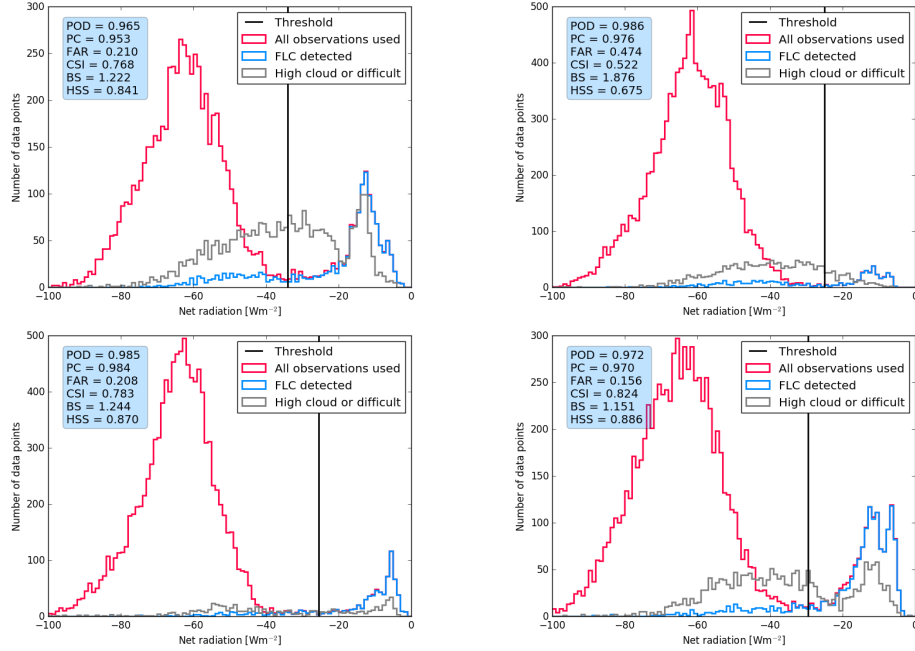

Figure 3: The validation of the algorithm computed separately for the seasons December, January, February (top left), March, April, May (top right), June July, August (bottom left) and September, October, November (bottom right).

## Product impact on science

Interesting and useful inference of spatial and diurnal variation in occurrence of FLC. Could you use a monthly varying composite to increase FLC frequency over the region?

In the current algorithm, we use two composites: a monthly and a yearly composite. We have also tested daytime-specific composites, but found no improvement in the performance of the algorithm.

## Other things

I can't locate the grey line in Figure 2a.

Thank you for pointing this out, this referred to an old version of the figure and is now deleted from the manuscript.

Figure 3b it is not obvious that the dot corresponds to the values from GK. Please explain this and the error bars in the figure.

We have now included this information in the caption of Fig. 3b).

The label “BC” should be BS in Figure 3b.

Yes, this is now corrected in the manuscript.

## References

Bendix, J. (2002). A satellite-based climatology of fog and low-level stratus in Germany and adjacent areas. *Atmospheric Research*, 64(1-4):3–18.

Cermak, J. and Bendix, J. (2007). Dynamical Nighttime Fog/Low Stratus Detection Based on Meteosat SEVIRI Data: A Feasibility Study. *Pure and Applied Geophysics*, 164(6-7):1179–1192.

Cermak, J. and Bendix, J. (2008). A novel approach to fog/low stratus detection using Meteosat 8 data. *Atmospheric Research*, 87(3-4):279–292.

Cermak, J. and Bendix, J. (2011). Detecting ground fog from space – a microphysics-based approach. *International Journal of Remote Sensing*, 32(12):3345–3371.

Eyre, J. R., Brownscombe, J. L., and Allam, R. J. (1984). Detection of fog at

209 night using Advanced Very High Resolution Radiometer (AVHRR) imagery.  
 210 *Meteorological Magazine*, 113:266–271.

211 Guls, I. and Bendix, J. (1996). Fog detection and fog mapping using low cost  
 212 Meteosat-WEFAX transmission. *Meteorological Applications*, 3:179–187.

213 Nilo, S., Romano, F., Cermak, J., Cimini, D., Ricciardelli, E., Cersosimo, A.,  
 214 Di Paola, F., Gallucci, D., Gentile, S., Gerdali, E., Larosa, S., Ripepi, E., and  
 215 Viggiano, M. (2018). Fog Detection Based on Meteosat Second Generation-  
 216 Spinning Enhanced Visible and InfraRed Imager High Resolution Visible  
 217 Channel. *Remote Sensing*, 10(4):541.
